# Supplementary material for: Membrane Lipid Replacement with Glycerolphospholipids Slowly Reduces Self-Reported Symptom Severities in Chemically Exposed Gulf War Veterans
Source: MDPI journal article supplement (doi:10.3390/ijtm2020014), 2022-04-29
Supplement: s1 [file s1]

Date: \_\_\_\_\_

## CHRONIC ILLNESS SURVEY FORM

For Use in IRB Approved Clinical Studies

**Each Patient Must Fill Out This Form--Check Those That Apply**

NAME: \_\_\_\_\_ DOB: \_\_\_\_\_ RACE: White \_\_\_\_ Black \_\_\_\_ Latino \_\_\_\_ Asian \_\_\_\_ Other \_\_\_\_\_

ADDRESS: \_\_\_\_\_ HOME PH: \_\_\_\_\_

**IF FAMILY MEMBER:** Wife \_\_\_\_ Husband \_\_\_\_ Child \_\_\_\_ Other Relative \_\_\_\_\_ WORK PH: \_\_\_\_\_

**PERSONAL INFORMATION:** Male \_\_\_\_ Female \_\_\_\_ Smoker \_\_\_\_ Smokeless Tobacco \_\_\_\_ Date Quit Smoking: \_\_\_\_\_ Alcohol \_\_\_\_

EXPOSURE DATA: PREVIOUS LOCATIONS: UNIT/COMPANY:

\_\_\_\_\_  
Dates: \_\_\_\_\_ to \_\_\_\_\_

RECENT/PRESENT WORK: \_\_\_\_\_ LOCATION: \_\_\_\_\_ ZIP CODE: \_\_\_\_\_

DID EITHER PARENT EXPERIENCE ALLERGIES: YES \_\_\_\_ NO \_\_\_\_ Both \_\_\_\_ CHEMICAL SENSITIVITIES: YES \_\_\_\_ NO \_\_\_\_ Both \_\_\_\_

FIRST ONSET OF ILLNESS? Date \_\_\_\_\_ SECOND ONSET? Date \_\_\_\_\_ THIRD ONSET? Date \_\_\_\_\_

**INSTRUCTIONS: OF THE FOLLOWING SYMPTOMS, CHECK THOSE THAT APPLY, EVEN IF THEY OCCURRED INTERMITTENTLY. THE FIRST SCALE IS FOR SYMPTOMS BEFORE THE FIRST EPISODE OF ILLNESS. THE SECOND SCALE IS FOR SYMPTOMS AFTER THE FIRST ONSET OF ILLNESS. THE THIRD SCALE IS FOR SYMPTOMS EXPERIENCED AT THE TIME (WITHIN ONE WEEK) WHEN BLOOD WAS DRAWN FOR ANALYSIS. IF YOU FEEL THAT ANY QUESTION IS NOT APPROPRIATE, YOU MAY CROSS IT OUT AND CONTINUE TO FILL OUT THE QUESTIONNAIRE.**

### Heart Palpitations

|                           | None                   | Mild | Moderate | Severe | Extreme | Frequency<br>Times/Week |
|---------------------------|------------------------|------|----------|--------|---------|-------------------------|
| Prior to Onset of Illness | 0 1 2 3 4 5 6 7 8 9 10 |      |          |        |         |                         |
| After Onset of Illness    | 0 1 2 3 4 5 6 7 8 9 10 |      |          |        |         |                         |
| Within the last week      | 0 1 2 3 4 5 6 7 8 9 10 |      |          |        |         |                         |

### Chest Pain

|                           | None                   | Mild | Moderate | Severe | Extreme | Frequency<br>Times/Week |
|---------------------------|------------------------|------|----------|--------|---------|-------------------------|
| Prior to Onset of Illness | 0 1 2 3 4 5 6 7 8 9 10 |      |          |        |         |                         |
| After Onset of Illness    | 0 1 2 3 4 5 6 7 8 9 10 |      |          |        |         |                         |
| Within the last week      | 0 1 2 3 4 5 6 7 8 9 10 |      |          |        |         |                         |

### Skipped or Extra Heartbeats

|                           | None                   | Mild | Moderate | Severe | Extreme | Frequency<br>Times/Week |
|---------------------------|------------------------|------|----------|--------|---------|-------------------------|
| Prior to Onset of Illness | 0 1 2 3 4 5 6 7 8 9 10 |      |          |        |         |                         |
| After Onset of Illness    | 0 1 2 3 4 5 6 7 8 9 10 |      |          |        |         |                         |
| Within the last week      | 0 1 2 3 4 5 6 7 8 9 10 |      |          |        |         |                         |

Racing Pulse

|                           | None | Mild | Moderate | Severe | Extreme | Frequency<br>Times/Week |   |   |   |   |    |  |
|---------------------------|------|------|----------|--------|---------|-------------------------|---|---|---|---|----|--|
| Prior to Onset of Illness | 0    | 1    | 2        | 3      | 4       | 5                       | 6 | 7 | 8 | 9 | 10 |  |
| After Onset of Illness    | 0    | 1    | 2        | 3      | 4       | 5                       | 6 | 7 | 8 | 9 | 10 |  |
| Within the last week      | 0    | 1    | 2        | 3      | 4       | 5                       | 6 | 7 | 8 | 9 | 10 |  |

Chest Pressure (Like a giant rubber band around your chest)

|                           | None | Mild | Moderate | Severe | Extreme | Frequency<br>Times/Week |   |   |   |   |    |  |
|---------------------------|------|------|----------|--------|---------|-------------------------|---|---|---|---|----|--|
| Prior to Onset of Illness | 0    | 1    | 2        | 3      | 4       | 5                       | 6 | 7 | 8 | 9 | 10 |  |
| After Onset of Illness    | 0    | 1    | 2        | 3      | 4       | 5                       | 6 | 7 | 8 | 9 | 10 |  |
| Within the last week      | 0    | 1    | 2        | 3      | 4       | 5                       | 6 | 7 | 8 | 9 | 10 |  |

Nasal Congestion or Stiffness

|                           | None | Mild | Moderate | Severe | Extreme | Frequency<br>Times/Week |   |   |   |   |    |  |
|---------------------------|------|------|----------|--------|---------|-------------------------|---|---|---|---|----|--|
| Prior to Onset of Illness | 0    | 1    | 2        | 3      | 4       | 5                       | 6 | 7 | 8 | 9 | 10 |  |
| After Onset of Illness    | 0    | 1    | 2        | 3      | 4       | 5                       | 6 | 7 | 8 | 9 | 10 |  |
| Within the last week      | 0    | 1    | 2        | 3      | 4       | 5                       | 6 | 7 | 8 | 9 | 10 |  |

Nasal Mucus Discharge

|                           | None | Mild | Moderate | Severe | Extreme | Frequency<br>Times/Week |   |   |   |   |    |  |
|---------------------------|------|------|----------|--------|---------|-------------------------|---|---|---|---|----|--|
| Prior to Onset of Illness | 0    | 1    | 2        | 3      | 4       | 5                       | 6 | 7 | 8 | 9 | 10 |  |
| After Onset of Illness    | 0    | 1    | 2        | 3      | 4       | 5                       | 6 | 7 | 8 | 9 | 10 |  |
| Within the last week      | 0    | 1    | 2        | 3      | 4       | 5                       | 6 | 7 | 8 | 9 | 10 |  |

Sinus Pain

|                           | None | Mild | Moderate | Severe | Extreme | Frequency<br>Times/Week |   |   |   |   |    |  |
|---------------------------|------|------|----------|--------|---------|-------------------------|---|---|---|---|----|--|
| Prior to Onset of Illness | 0    | 1    | 2        | 3      | 4       | 5                       | 6 | 7 | 8 | 9 | 10 |  |
| After Onset of Illness    | 0    | 1    | 2        | 3      | 4       | 5                       | 6 | 7 | 8 | 9 | 10 |  |
| Within the last week      | 0    | 1    | 2        | 3      | 4       | 5                       | 6 | 7 | 8 | 9 | 10 |  |

Sore Throat

|                           | None | Mild | Moderate | Severe | Extreme | Frequency<br>Times/Week |   |   |   |   |    |  |
|---------------------------|------|------|----------|--------|---------|-------------------------|---|---|---|---|----|--|
| Prior to Onset of Illness | 0    | 1    | 2        | 3      | 4       | 5                       | 6 | 7 | 8 | 9 | 10 |  |
| After Onset of Illness    | 0    | 1    | 2        | 3      | 4       | 5                       | 6 | 7 | 8 | 9 | 10 |  |
| Within the last week      | 0    | 1    | 2        | 3      | 4       | 5                       | 6 | 7 | 8 | 9 | 10 |  |

Unable to Breathe Deeply

|                           | None | Mild | Moderate | Severe | Extreme | Frequency<br>Times/Week |   |   |   |   |    |  |
|---------------------------|------|------|----------|--------|---------|-------------------------|---|---|---|---|----|--|
| Prior to Onset of Illness | 0    | 1    | 2        | 3      | 4       | 5                       | 6 | 7 | 8 | 9 | 10 |  |
| After Onset of Illness    | 0    | 1    | 2        | 3      | 4       | 5                       | 6 | 7 | 8 | 9 | 10 |  |
| Within the last week      | 0    | 1    | 2        | 3      | 4       | 5                       | 6 | 7 | 8 | 9 | 10 |  |

Wheezing, at Rest [ ], or with Exertion [ ] (Check one or both)

|                           | None | Mild | Moderate | Severe | Extreme | Frequency<br>Times/Week |   |   |   |   |    |  |
|---------------------------|------|------|----------|--------|---------|-------------------------|---|---|---|---|----|--|
| Prior to Onset of Illness | 0    | 1    | 2        | 3      | 4       | 5                       | 6 | 7 | 8 | 9 | 10 |  |
| After Onset of Illness    | 0    | 1    | 2        | 3      | 4       | 5                       | 6 | 7 | 8 | 9 | 10 |  |
| Within the last week      | 0    | 1    | 2        | 3      | 4       | 5                       | 6 | 7 | 8 | 9 | 10 |  |

Shortness of Breath, at Rest [ ], or with Exertion [ ]

|                           | None | Mild | Moderate | Severe | Extreme | Frequency Times/Week |   |   |   |   |    |  |
|---------------------------|------|------|----------|--------|---------|----------------------|---|---|---|---|----|--|
| Prior to Onset of Illness | 0    | 1    | 2        | 3      | 4       | 5                    | 6 | 7 | 8 | 9 | 10 |  |
| After Onset of Illness    | 0    | 1    | 2        | 3      | 4       | 5                    | 6 | 7 | 8 | 9 | 10 |  |
| Within the last week      | 0    | 1    | 2        | 3      | 4       | 5                    | 6 | 7 | 8 | 9 | 10 |  |

Coughing Frequently

|                           | None | Mild | Moderate | Severe | Extreme | Frequency Times/Week |   |   |   |   |    |  |
|---------------------------|------|------|----------|--------|---------|----------------------|---|---|---|---|----|--|
| Prior to Onset of Illness | 0    | 1    | 2        | 3      | 4       | 5                    | 6 | 7 | 8 | 9 | 10 |  |
| After Onset of Illness    | 0    | 1    | 2        | 3      | 4       | 5                    | 6 | 7 | 8 | 9 | 10 |  |
| Within the last week      | 0    | 1    | 2        | 3      | 4       | 5                    | 6 | 7 | 8 | 9 | 10 |  |

Coughing up Thick Saliva or Phlegm

|                           | None | Mild | Moderate | Severe | Extreme | Frequency Times/Week |   |   |   |   |    |  |
|---------------------------|------|------|----------|--------|---------|----------------------|---|---|---|---|----|--|
| Prior to Onset of Illness | 0    | 1    | 2        | 3      | 4       | 5                    | 6 | 7 | 8 | 9 | 10 |  |
| After Onset of Illness    | 0    | 1    | 2        | 3      | 4       | 5                    | 6 | 7 | 8 | 9 | 10 |  |
| Within the last week      | 0    | 1    | 2        | 3      | 4       | 5                    | 6 | 7 | 8 | 9 | 10 |  |

Frequent Clearing of Throat

|                           | None | Mild | Moderate | Severe | Extreme | Frequency Times/Week |   |   |   |   |    |  |
|---------------------------|------|------|----------|--------|---------|----------------------|---|---|---|---|----|--|
| Prior to Onset of Illness | 0    | 1    | 2        | 3      | 4       | 5                    | 6 | 7 | 8 | 9 | 10 |  |
| After Onset of Illness    | 0    | 1    | 2        | 3      | 4       | 5                    | 6 | 7 | 8 | 9 | 10 |  |
| Within the last week      | 0    | 1    | 2        | 3      | 4       | 5                    | 6 | 7 | 8 | 9 | 10 |  |

Excessive Sneezing

|                           | None | Mild | Moderate | Severe | Extreme | Frequency Times/Week |   |   |   |   |    |  |
|---------------------------|------|------|----------|--------|---------|----------------------|---|---|---|---|----|--|
| Prior to Onset of Illness | 0    | 1    | 2        | 3      | 4       | 5                    | 6 | 7 | 8 | 9 | 10 |  |
| After Onset of Illness    | 0    | 1    | 2        | 3      | 4       | 5                    | 6 | 7 | 8 | 9 | 10 |  |
| Within the last week      | 0    | 1    | 2        | 3      | 4       | 5                    | 6 | 7 | 8 | 9 | 10 |  |

Loss of Interest or Enthusiasm

|                           | None | Mild | Moderate | Severe | Extreme | Frequency Times/Week |   |   |   |   |    |  |
|---------------------------|------|------|----------|--------|---------|----------------------|---|---|---|---|----|--|
| Prior to Onset of Illness | 0    | 1    | 2        | 3      | 4       | 5                    | 6 | 7 | 8 | 9 | 10 |  |
| After Onset of Illness    | 0    | 1    | 2        | 3      | 4       | 5                    | 6 | 7 | 8 | 9 | 10 |  |
| Within the last week      | 0    | 1    | 2        | 3      | 4       | 5                    | 6 | 7 | 8 | 9 | 10 |  |

Suicidal Thoughts

|                           | None | Mild | Moderate | Severe | Extreme | Frequency Times/Week |   |   |   |   |    |  |
|---------------------------|------|------|----------|--------|---------|----------------------|---|---|---|---|----|--|
| Prior to Onset of Illness | 0    | 1    | 2        | 3      | 4       | 5                    | 6 | 7 | 8 | 9 | 10 |  |
| After Onset of Illness    | 0    | 1    | 2        | 3      | 4       | 5                    | 6 | 7 | 8 | 9 | 10 |  |
| Within the last week      | 0    | 1    | 2        | 3      | 4       | 5                    | 6 | 7 | 8 | 9 | 10 |  |

Depression

|                           | None | Mild | Moderate | Severe | Extreme | Frequency Times/Week |   |   |   |   |    |  |
|---------------------------|------|------|----------|--------|---------|----------------------|---|---|---|---|----|--|
| Prior to Onset of Illness | 0    | 1    | 2        | 3      | 4       | 5                    | 6 | 7 | 8 | 9 | 10 |  |
| After Onset of Illness    | 0    | 1    | 2        | 3      | 4       | 5                    | 6 | 7 | 8 | 9 | 10 |  |
| Within the last week      | 0    | 1    | 2        | 3      | 4       | 5                    | 6 | 7 | 8 | 9 | 10 |  |

Nightmares

|                           | None | Mild | Moderate | Severe | Extreme | Frequency<br>Times/Week |   |   |   |   |    |  |
|---------------------------|------|------|----------|--------|---------|-------------------------|---|---|---|---|----|--|
| Prior to Onset of Illness | 0    | 1    | 2        | 3      | 4       | 5                       | 6 | 7 | 8 | 9 | 10 |  |
| After Onset of Illness    | 0    | 1    | 2        | 3      | 4       | 5                       | 6 | 7 | 8 | 9 | 10 |  |
| Within the last week      | 0    | 1    | 2        | 3      | 4       | 5                       | 6 | 7 | 8 | 9 | 10 |  |

Unrefreshed Sleep

|                           | None | Mild | Moderate | Severe | Extreme | Frequency<br>Times/Week |   |   |   |   |    |  |
|---------------------------|------|------|----------|--------|---------|-------------------------|---|---|---|---|----|--|
| Prior to Onset of Illness | 0    | 1    | 2        | 3      | 4       | 5                       | 6 | 7 | 8 | 9 | 10 |  |
| After Onset of Illness    | 0    | 1    | 2        | 3      | 4       | 5                       | 6 | 7 | 8 | 9 | 10 |  |
| Within the last week      | 0    | 1    | 2        | 3      | 4       | 5                       | 6 | 7 | 8 | 9 | 10 |  |

Irritable

|                           | None | Mild | Moderate | Severe | Extreme | Frequency<br>Times/Week |   |   |   |   |    |  |
|---------------------------|------|------|----------|--------|---------|-------------------------|---|---|---|---|----|--|
| Prior to Onset of Illness | 0    | 1    | 2        | 3      | 4       | 5                       | 6 | 7 | 8 | 9 | 10 |  |
| After Onset of Illness    | 0    | 1    | 2        | 3      | 4       | 5                       | 6 | 7 | 8 | 9 | 10 |  |
| Within the last week      | 0    | 1    | 2        | 3      | 4       | 5                       | 6 | 7 | 8 | 9 | 10 |  |

Mood Swings

|                           | None | Mild | Moderate | Severe | Extreme | Frequency<br>Times/Week |   |   |   |   |    |  |
|---------------------------|------|------|----------|--------|---------|-------------------------|---|---|---|---|----|--|
| Prior to Onset of Illness | 0    | 1    | 2        | 3      | 4       | 5                       | 6 | 7 | 8 | 9 | 10 |  |
| After Onset of Illness    | 0    | 1    | 2        | 3      | 4       | 5                       | 6 | 7 | 8 | 9 | 10 |  |
| Within the last week      | 0    | 1    | 2        | 3      | 4       | 5                       | 6 | 7 | 8 | 9 | 10 |  |

Chronic Fatigue, Excessive Tiredness

|                           | None | Mild | Moderate | Severe | Extreme | Frequency<br>Times/Week |   |   |   |   |    |  |
|---------------------------|------|------|----------|--------|---------|-------------------------|---|---|---|---|----|--|
| Prior to Onset of Illness | 0    | 1    | 2        | 3      | 4       | 5                       | 6 | 7 | 8 | 9 | 10 |  |
| After Onset of Illness    | 0    | 1    | 2        | 3      | 4       | 5                       | 6 | 7 | 8 | 9 | 10 |  |
| Within the last week      | 0    | 1    | 2        | 3      | 4       | 5                       | 6 | 7 | 8 | 9 | 10 |  |

Night Sweats

|                           | None | Mild | Moderate | Severe | Extreme | Frequency<br>Times/Week |   |   |   |   |    |  |
|---------------------------|------|------|----------|--------|---------|-------------------------|---|---|---|---|----|--|
| Prior to Onset of Illness | 0    | 1    | 2        | 3      | 4       | 5                       | 6 | 7 | 8 | 9 | 10 |  |
| After Onset of Illness    | 0    | 1    | 2        | 3      | 4       | 5                       | 6 | 7 | 8 | 9 | 10 |  |
| Within the last week      | 0    | 1    | 2        | 3      | 4       | 5                       | 6 | 7 | 8 | 9 | 10 |  |

Intermittent Fever at Night

|                           | None | Mild | Moderate | Severe | Extreme | Frequency<br>Times/Week |   |   |   |   |    |  |
|---------------------------|------|------|----------|--------|---------|-------------------------|---|---|---|---|----|--|
| Prior to Onset of Illness | 0    | 1    | 2        | 3      | 4       | 5                       | 6 | 7 | 8 | 9 | 10 |  |
| After Onset of Illness    | 0    | 1    | 2        | 3      | 4       | 5                       | 6 | 7 | 8 | 9 | 10 |  |
| Within the last week      | 0    | 1    | 2        | 3      | 4       | 5                       | 6 | 7 | 8 | 9 | 10 |  |

Hair Loss

|                           | None | Mild | Moderate | Severe | Extreme | Frequency<br>Times/Week |   |   |   |   |    |  |
|---------------------------|------|------|----------|--------|---------|-------------------------|---|---|---|---|----|--|
| Prior to Onset of Illness | 0    | 1    | 2        | 3      | 4       | 5                       | 6 | 7 | 8 | 9 | 10 |  |
| After Onset of Illness    | 0    | 1    | 2        | 3      | 4       | 5                       | 6 | 7 | 8 | 9 | 10 |  |
| Within the last week      | 0    | 1    | 2        | 3      | 4       | 5                       | 6 | 7 | 8 | 9 | 10 |  |

Abnormal Change of Hair Color

|                           | None | Mild | Moderate | Severe | Extreme | Frequency<br>Times/Week |   |   |   |   |    |  |
|---------------------------|------|------|----------|--------|---------|-------------------------|---|---|---|---|----|--|
| Prior to Onset of Illness | 0    | 1    | 2        | 3      | 4       | 5                       | 6 | 7 | 8 | 9 | 10 |  |
| After Onset of Illness    | 0    | 1    | 2        | 3      | 4       | 5                       | 6 | 7 | 8 | 9 | 10 |  |
| Within the last week      | 0    | 1    | 2        | 3      | 4       | 5                       | 6 | 7 | 8 | 9 | 10 |  |

Skin Rashes

|                           | None | Mild | Moderate | Severe | Extreme | Frequency<br>Times/Week |   |   |   |   |    |  |
|---------------------------|------|------|----------|--------|---------|-------------------------|---|---|---|---|----|--|
| Prior to Onset of Illness | 0    | 1    | 2        | 3      | 4       | 5                       | 6 | 7 | 8 | 9 | 10 |  |
| After Onset of Illness    | 0    | 1    | 2        | 3      | 4       | 5                       | 6 | 7 | 8 | 9 | 10 |  |
| Within the last week      | 0    | 1    | 2        | 3      | 4       | 5                       | 6 | 7 | 8 | 9 | 10 |  |

Reddening or Flushing of Skin

|                           | None | Mild | Moderate | Severe | Extreme | Frequency<br>Times/Week |   |   |   |   |    |  |
|---------------------------|------|------|----------|--------|---------|-------------------------|---|---|---|---|----|--|
| Prior to Onset of Illness | 0    | 1    | 2        | 3      | 4       | 5                       | 6 | 7 | 8 | 9 | 10 |  |
| After Onset of Illness    | 0    | 1    | 2        | 3      | 4       | 5                       | 6 | 7 | 8 | 9 | 10 |  |
| Within the last week      | 0    | 1    | 2        | 3      | 4       | 5                       | 6 | 7 | 8 | 9 | 10 |  |

Skin Itching

|                           | None | Mild | Moderate | Severe | Extreme | Frequency<br>Times/Week |   |   |   |   |    |  |
|---------------------------|------|------|----------|--------|---------|-------------------------|---|---|---|---|----|--|
| Prior to Onset of Illness | 0    | 1    | 2        | 3      | 4       | 5                       | 6 | 7 | 8 | 9 | 10 |  |
| After Onset of Illness    | 0    | 1    | 2        | 3      | 4       | 5                       | 6 | 7 | 8 | 9 | 10 |  |
| Within the last week      | 0    | 1    | 2        | 3      | 4       | 5                       | 6 | 7 | 8 | 9 | 10 |  |

Cracking, Peeling of Skin

|                           | None | Mild | Moderate | Severe | Extreme | Frequency<br>Times/Week |   |   |   |   |    |  |
|---------------------------|------|------|----------|--------|---------|-------------------------|---|---|---|---|----|--|
| Prior to Onset of Illness | 0    | 1    | 2        | 3      | 4       | 5                       | 6 | 7 | 8 | 9 | 10 |  |
| After Onset of Illness    | 0    | 1    | 2        | 3      | 4       | 5                       | 6 | 7 | 8 | 9 | 10 |  |
| Within the last week      | 0    | 1    | 2        | 3      | 4       | 5                       | 6 | 7 | 8 | 9 | 10 |  |

Cuts & Wounds Slow to Heal

|                           | None | Mild | Moderate | Severe | Extreme | Frequency<br>Times/Week |   |   |   |   |    |  |
|---------------------------|------|------|----------|--------|---------|-------------------------|---|---|---|---|----|--|
| Prior to Onset of Illness | 0    | 1    | 2        | 3      | 4       | 5                       | 6 | 7 | 8 | 9 | 10 |  |
| After Onset of Illness    | 0    | 1    | 2        | 3      | 4       | 5                       | 6 | 7 | 8 | 9 | 10 |  |
| Within the last week      | 0    | 1    | 2        | 3      | 4       | 5                       | 6 | 7 | 8 | 9 | 10 |  |

White Itchy-Scale Between Toes

|                           | None | Mild | Moderate | Severe | Extreme | Frequency<br>Times/Week |   |   |   |   |    |  |
|---------------------------|------|------|----------|--------|---------|-------------------------|---|---|---|---|----|--|
| Prior to Onset of Illness | 0    | 1    | 2        | 3      | 4       | 5                       | 6 | 7 | 8 | 9 | 10 |  |
| After Onset of Illness    | 0    | 1    | 2        | 3      | 4       | 5                       | 6 | 7 | 8 | 9 | 10 |  |
| Within the last week      | 0    | 1    | 2        | 3      | 4       | 5                       | 6 | 7 | 8 | 9 | 10 |  |

Unusual Skin Rashes

|                           | None | Mild | Moderate | Severe | Extreme | Frequency<br>Times/Week |   |   |   |   |    |  |
|---------------------------|------|------|----------|--------|---------|-------------------------|---|---|---|---|----|--|
| Prior to Onset of Illness | 0    | 1    | 2        | 3      | 4       | 5                       | 6 | 7 | 8 | 9 | 10 |  |
| After Onset of Illness    | 0    | 1    | 2        | 3      | 4       | 5                       | 6 | 7 | 8 | 9 | 10 |  |
| Within the last week      | 0    | 1    | 2        | 3      | 4       | 5                       | 6 | 7 | 8 | 9 | 10 |  |

Yellowing Color of Skin

|                           | None | Mild | Moderate | Severe | Extreme | Frequency<br>Times/Week |   |   |   |   |    |  |
|---------------------------|------|------|----------|--------|---------|-------------------------|---|---|---|---|----|--|
| Prior to Onset of Illness | 0    | 1    | 2        | 3      | 4       | 5                       | 6 | 7 | 8 | 9 | 10 |  |
| After Onset of Illness    | 0    | 1    | 2        | 3      | 4       | 5                       | 6 | 7 | 8 | 9 | 10 |  |
| Within the last week      | 0    | 1    | 2        | 3      | 4       | 5                       | 6 | 7 | 8 | 9 | 10 |  |

Skin Sunburn-like Sensation

|                           | None | Mild | Moderate | Severe | Extreme | Frequency<br>Times/Week |   |   |   |   |    |  |
|---------------------------|------|------|----------|--------|---------|-------------------------|---|---|---|---|----|--|
| Prior to Onset of Illness | 0    | 1    | 2        | 3      | 4       | 5                       | 6 | 7 | 8 | 9 | 10 |  |
| After Onset of Illness    | 0    | 1    | 2        | 3      | 4       | 5                       | 6 | 7 | 8 | 9 | 10 |  |
| Within the last week      | 0    | 1    | 2        | 3      | 4       | 5                       | 6 | 7 | 8 | 9 | 10 |  |

Wart-like Growths on Skin

|                           | None | Mild | Moderate | Severe | Extreme | Frequency<br>Times/Week |   |   |   |   |    |  |
|---------------------------|------|------|----------|--------|---------|-------------------------|---|---|---|---|----|--|
| Prior to Onset of Illness | 0    | 1    | 2        | 3      | 4       | 5                       | 6 | 7 | 8 | 9 | 10 |  |
| After Onset of Illness    | 0    | 1    | 2        | 3      | 4       | 5                       | 6 | 7 | 8 | 9 | 10 |  |
| Within the last week      | 0    | 1    | 2        | 3      | 4       | 5                       | 6 | 7 | 8 | 9 | 10 |  |

Genital Itch

|                           | None | Mild | Moderate | Severe | Extreme | Frequency<br>Times/Week |   |   |   |   |    |  |
|---------------------------|------|------|----------|--------|---------|-------------------------|---|---|---|---|----|--|
| Prior to Onset of Illness | 0    | 1    | 2        | 3      | 4       | 5                       | 6 | 7 | 8 | 9 | 10 |  |
| After Onset of Illness    | 0    | 1    | 2        | 3      | 4       | 5                       | 6 | 7 | 8 | 9 | 10 |  |
| Within the last week      | 0    | 1    | 2        | 3      | 4       | 5                       | 6 | 7 | 8 | 9 | 10 |  |

Itchy Scalp

|                           | None | Mild | Moderate | Severe | Extreme | Frequency<br>Times/Week |   |   |   |   |    |  |
|---------------------------|------|------|----------|--------|---------|-------------------------|---|---|---|---|----|--|
| Prior to Onset of Illness | 0    | 1    | 2        | 3      | 4       | 5                       | 6 | 7 | 8 | 9 | 10 |  |
| After Onset of Illness    | 0    | 1    | 2        | 3      | 4       | 5                       | 6 | 7 | 8 | 9 | 10 |  |
| Within the last week      | 0    | 1    | 2        | 3      | 4       | 5                       | 6 | 7 | 8 | 9 | 10 |  |

Difficulty Swallowing

|                           | None | Mild | Moderate | Severe | Extreme | Frequency<br>Times/Week |   |   |   |   |    |  |
|---------------------------|------|------|----------|--------|---------|-------------------------|---|---|---|---|----|--|
| Prior to Onset of Illness | 0    | 1    | 2        | 3      | 4       | 5                       | 6 | 7 | 8 | 9 | 10 |  |
| After Onset of Illness    | 0    | 1    | 2        | 3      | 4       | 5                       | 6 | 7 | 8 | 9 | 10 |  |
| Within the last week      | 0    | 1    | 2        | 3      | 4       | 5                       | 6 | 7 | 8 | 9 | 10 |  |

Stomach Cramps

|                           | None | Mild | Moderate | Severe | Extreme | Frequency<br>Times/Week |   |   |   |   |    |  |
|---------------------------|------|------|----------|--------|---------|-------------------------|---|---|---|---|----|--|
| Prior to Onset of Illness | 0    | 1    | 2        | 3      | 4       | 5                       | 6 | 7 | 8 | 9 | 10 |  |
| After Onset of Illness    | 0    | 1    | 2        | 3      | 4       | 5                       | 6 | 7 | 8 | 9 | 10 |  |
| Within the last week      | 0    | 1    | 2        | 3      | 4       | 5                       | 6 | 7 | 8 | 9 | 10 |  |

Stomach Pain

|                           | None | Mild | Moderate | Severe | Extreme | Frequency<br>Times/Week |   |   |   |   |    |  |
|---------------------------|------|------|----------|--------|---------|-------------------------|---|---|---|---|----|--|
| Prior to Onset of Illness | 0    | 1    | 2        | 3      | 4       | 5                       | 6 | 7 | 8 | 9 | 10 |  |
| After Onset of Illness    | 0    | 1    | 2        | 3      | 4       | 5                       | 6 | 7 | 8 | 9 | 10 |  |
| Within the last week      | 0    | 1    | 2        | 3      | 4       | 5                       | 6 | 7 | 8 | 9 | 10 |  |

Diarrhea (Passage of Loose, Watery Stools)

|                           | None<br>0 | 1 | Mild<br>2 | 3 | Moderate<br>4 | 5 | 6 | Severe<br>7 | 8 | Extreme<br>9 | 10 | Frequency<br>Times/Week |
|---------------------------|-----------|---|-----------|---|---------------|---|---|-------------|---|--------------|----|-------------------------|
| Prior to Onset of Illness | 0         | 1 | 2         | 3 | 4             | 5 | 6 | 7           | 8 | 9            | 10 |                         |
| After Onset of Illness    | 0         | 1 | 2         | 3 | 4             | 5 | 6 | 7           | 8 | 9            | 10 |                         |
| Within the last week      | 0         | 1 | 2         | 3 | 4             | 5 | 6 | 7           | 8 | 9            | 10 |                         |

Gas (Passage of Excess Gas, Flatus)

|                           | None<br>0 | 1 | Mild<br>2 | 3 | Moderate<br>4 | 5 | 6 | Severe<br>7 | 8 | Extreme<br>9 | 10 | Frequency<br>Times/Week |
|---------------------------|-----------|---|-----------|---|---------------|---|---|-------------|---|--------------|----|-------------------------|
| Prior to Onset of Illness | 0         | 1 | 2         | 3 | 4             | 5 | 6 | 7           | 8 | 9            | 10 |                         |
| After Onset of Illness    | 0         | 1 | 2         | 3 | 4             | 5 | 6 | 7           | 8 | 9            | 10 |                         |
| Within the last week      | 0         | 1 | 2         | 3 | 4             | 5 | 6 | 7           | 8 | 9            | 10 |                         |

Bloating

|                           | None<br>0 | 1 | Mild<br>2 | 3 | Moderate<br>4 | 5 | 6 | Severe<br>7 | 8 | Extreme<br>9 | 10 | Frequency<br>Times/Week |
|---------------------------|-----------|---|-----------|---|---------------|---|---|-------------|---|--------------|----|-------------------------|
| Prior to Onset of Illness | 0         | 1 | 2         | 3 | 4             | 5 | 6 | 7           | 8 | 9            | 10 |                         |
| After Onset of Illness    | 0         | 1 | 2         | 3 | 4             | 5 | 6 | 7           | 8 | 9            | 10 |                         |
| Within the last week      | 0         | 1 | 2         | 3 | 4             | 5 | 6 | 7           | 8 | 9            | 10 |                         |

Lack of Bladder Control (small volume)

|                           | None<br>0 | 1 | Mild<br>2 | 3 | Moderate<br>4 | 5 | 6 | Severe<br>7 | 8 | Extreme<br>9 | 10 | Frequency<br>Times/Week |
|---------------------------|-----------|---|-----------|---|---------------|---|---|-------------|---|--------------|----|-------------------------|
| Prior to Onset of Illness | 0         | 1 | 2         | 3 | 4             | 5 | 6 | 7           | 8 | 9            | 10 |                         |
| After Onset of Illness    | 0         | 1 | 2         | 3 | 4             | 5 | 6 | 7           | 8 | 9            | 10 |                         |
| Within the last week      | 0         | 1 | 2         | 3 | 4             | 5 | 6 | 7           | 8 | 9            | 10 |                         |

More Frequent Episodes of Urination

|                           | None<br>0 | 1 | Mild<br>2 | 3 | Moderate<br>4 | 5 | 6 | Severe<br>7 | 8 | Extreme<br>9 | 10 | Frequency<br>Times/Week |
|---------------------------|-----------|---|-----------|---|---------------|---|---|-------------|---|--------------|----|-------------------------|
| Prior to Onset of Illness | 0         | 1 | 2         | 3 | 4             | 5 | 6 | 7           | 8 | 9            | 10 |                         |
| After Onset of Illness    | 0         | 1 | 2         | 3 | 4             | 5 | 6 | 7           | 8 | 9            | 10 |                         |
| Within the last week      | 0         | 1 | 2         | 3 | 4             | 5 | 6 | 7           | 8 | 9            | 10 |                         |

Episodes of Blood in Stools

|                           | None<br>0 | 1 | Mild<br>2 | 3 | Moderate<br>4 | 5 | 6 | Severe<br>7 | 8 | Extreme<br>9 | 10 | Frequency<br>Times/Week |
|---------------------------|-----------|---|-----------|---|---------------|---|---|-------------|---|--------------|----|-------------------------|
| Prior to Onset of Illness | 0         | 1 | 2         | 3 | 4             | 5 | 6 | 7           | 8 | 9            | 10 |                         |
| After Onset of Illness    | 0         | 1 | 2         | 3 | 4             | 5 | 6 | 7           | 8 | 9            | 10 |                         |
| Within the last week      | 0         | 1 | 2         | 3 | 4             | 5 | 6 | 7           | 8 | 9            | 10 |                         |

Episodes of Blood in Urine

|                           | None<br>0 | 1 | Mild<br>2 | 3 | Moderate<br>4 | 5 | 6 | Severe<br>7 | 8 | Extreme<br>9 | 10 | Frequency<br>Times/Week |
|---------------------------|-----------|---|-----------|---|---------------|---|---|-------------|---|--------------|----|-------------------------|
| Prior to Onset of Illness | 0         | 1 | 2         | 3 | 4             | 5 | 6 | 7           | 8 | 9            | 10 |                         |
| After Onset of Illness    | 0         | 1 | 2         | 3 | 4             | 5 | 6 | 7           | 8 | 9            | 10 |                         |
| Within the last week      | 0         | 1 | 2         | 3 | 4             | 5 | 6 | 7           | 8 | 9            | 10 |                         |

Nausea

|                           | None<br>0 | 1 | Mild<br>2 | 3 | Moderate<br>4 | 5 | 6 | Severe<br>7 | 8 | Extreme<br>9 | 10 | Frequency<br>Times/Week |
|---------------------------|-----------|---|-----------|---|---------------|---|---|-------------|---|--------------|----|-------------------------|
| Prior to Onset of Illness | 0         | 1 | 2         | 3 | 4             | 5 | 6 | 7           | 8 | 9            | 10 |                         |
| After Onset of Illness    | 0         | 1 | 2         | 3 | 4             | 5 | 6 | 7           | 8 | 9            | 10 |                         |
| Within the last week      | 0         | 1 | 2         | 3 | 4             | 5 | 6 | 7           | 8 | 9            | 10 |                         |

Vomiting

|                           | None                   | Mild | Moderate | Severe | Extreme | Frequency<br>Times/Week |
|---------------------------|------------------------|------|----------|--------|---------|-------------------------|
| Prior to Onset of Illness | 0 1 2 3 4 5 6 7 8 9 10 |      |          |        |         |                         |
| After Onset of Illness    | 0 1 2 3 4 5 6 7 8 9 10 |      |          |        |         |                         |
| Within the last week      | 0 1 2 3 4 5 6 7 8 9 10 |      |          |        |         |                         |

Regurgitate (Throwing Up) Food

|                           | None                   | Mild | Moderate | Severe | Extreme | Frequency<br>Times/Week |
|---------------------------|------------------------|------|----------|--------|---------|-------------------------|
| Prior to Onset of Illness | 0 1 2 3 4 5 6 7 8 9 10 |      |          |        |         |                         |
| After Onset of Illness    | 0 1 2 3 4 5 6 7 8 9 10 |      |          |        |         |                         |
| Within the last week      | 0 1 2 3 4 5 6 7 8 9 10 |      |          |        |         |                         |

Bleeding gums

|                           | None                   | Mild | Moderate | Severe | Extreme | Frequency<br>Times/Week |
|---------------------------|------------------------|------|----------|--------|---------|-------------------------|
| Prior to Onset of Illness | 0 1 2 3 4 5 6 7 8 9 10 |      |          |        |         |                         |
| After Onset of Illness    | 0 1 2 3 4 5 6 7 8 9 10 |      |          |        |         |                         |
| Within the last week      | 0 1 2 3 4 5 6 7 8 9 10 |      |          |        |         |                         |

Dental Abscesses

|                           | None                   | Mild | Moderate | Severe | Extreme | Frequency<br>Times/Week |
|---------------------------|------------------------|------|----------|--------|---------|-------------------------|
| Prior to Onset of Illness | 0 1 2 3 4 5 6 7 8 9 10 |      |          |        |         |                         |
| After Onset of Illness    | 0 1 2 3 4 5 6 7 8 9 10 |      |          |        |         |                         |
| Within the last week      | 0 1 2 3 4 5 6 7 8 9 10 |      |          |        |         |                         |

Increased Salivation

|                           | None                   | Mild | Moderate | Severe | Extreme | Frequency<br>Times/Week |
|---------------------------|------------------------|------|----------|--------|---------|-------------------------|
| Prior to Onset of Illness | 0 1 2 3 4 5 6 7 8 9 10 |      |          |        |         |                         |
| After Onset of Illness    | 0 1 2 3 4 5 6 7 8 9 10 |      |          |        |         |                         |
| Within the last week      | 0 1 2 3 4 5 6 7 8 9 10 |      |          |        |         |                         |

Blurred Vision

|                           | None                   | Mild | Moderate | Severe | Extreme | Frequency<br>Times/Week |
|---------------------------|------------------------|------|----------|--------|---------|-------------------------|
| Prior to Onset of Illness | 0 1 2 3 4 5 6 7 8 9 10 |      |          |        |         |                         |
| After Onset of Illness    | 0 1 2 3 4 5 6 7 8 9 10 |      |          |        |         |                         |
| Within the last week      | 0 1 2 3 4 5 6 7 8 9 10 |      |          |        |         |                         |

Double or Wavy Vision

|                           | None                   | Mild | Moderate | Severe | Extreme | Frequency<br>Times/Week |
|---------------------------|------------------------|------|----------|--------|---------|-------------------------|
| Prior to Onset of Illness | 0 1 2 3 4 5 6 7 8 9 10 |      |          |        |         |                         |
| After Onset of Illness    | 0 1 2 3 4 5 6 7 8 9 10 |      |          |        |         |                         |
| Within the last week      | 0 1 2 3 4 5 6 7 8 9 10 |      |          |        |         |                         |

Problems with Eyeglasses Prescription

|                           | None                   | Mild | Moderate | Severe | Extreme | Frequency<br>Times/Week |
|---------------------------|------------------------|------|----------|--------|---------|-------------------------|
| Prior to Onset of Illness | 0 1 2 3 4 5 6 7 8 9 10 |      |          |        |         |                         |
| After Onset of Illness    | 0 1 2 3 4 5 6 7 8 9 10 |      |          |        |         |                         |
| Within the last week      | 0 1 2 3 4 5 6 7 8 9 10 |      |          |        |         |                         |

Deteriorated Night Vision

|                           | None                   | Mild | Moderate | Severe | Extreme | Frequency<br>Times/Week |
|---------------------------|------------------------|------|----------|--------|---------|-------------------------|
| Prior to Onset of Illness | 0 1 2 3 4 5 6 7 8 9 10 |      |          |        |         |                         |
| After Onset of Illness    | 0 1 2 3 4 5 6 7 8 9 10 |      |          |        |         |                         |
| Within the last week      | 0 1 2 3 4 5 6 7 8 9 10 |      |          |        |         |                         |



Increased Visual Sensitivity to Light

|                           | None | Mild | Moderate | Severe | Extreme | Frequency<br>Times/Week |
|---------------------------|------|------|----------|--------|---------|-------------------------|
| Prior to Onset of Illness | 0 1  | 2 3  | 4 5      | 6 7    | 8 9 10  |                         |
| After Onset of Illness    | 0 1  | 2 3  | 4 5      | 6 7    | 8 9 10  |                         |
| Within the last week      | 0 1  | 2 3  | 4 5      | 6 7    | 8 9 10  |                         |

Black Spots or Floaters in Eyes

|                           | None | Mild | Moderate | Severe | Extreme | Frequency<br>Times/Week |
|---------------------------|------|------|----------|--------|---------|-------------------------|
| Prior to Onset of Illness | 0 1  | 2 3  | 4 5      | 6 7    | 8 9 10  |                         |
| After Onset of Illness    | 0 1  | 2 3  | 4 5      | 6 7    | 8 9 10  |                         |
| Within the last week      | 0 1  | 2 3  | 4 5      | 6 7    | 8 9 10  |                         |

Bothersome Eye Twitching

|                           | None | Mild | Moderate | Severe | Extreme | Frequency<br>Times/Week |
|---------------------------|------|------|----------|--------|---------|-------------------------|
| Prior to Onset of Illness | 0 1  | 2 3  | 4 5      | 6 7    | 8 9 10  |                         |
| After Onset of Illness    | 0 1  | 2 3  | 4 5      | 6 7    | 8 9 10  |                         |
| Within the last week      | 0 1  | 2 3  | 4 5      | 6 7    | 8 9 10  |                         |

Dry Eyes

|                           | None | Mild | Moderate | Severe | Extreme | Frequency<br>Times/Week |
|---------------------------|------|------|----------|--------|---------|-------------------------|
| Prior to Onset of Illness | 0 1  | 2 3  | 4 5      | 6 7    | 8 9 10  |                         |
| After Onset of Illness    | 0 1  | 2 3  | 4 5      | 6 7    | 8 9 10  |                         |
| Within the last week      | 0 1  | 2 3  | 4 5      | 6 7    | 8 9 10  |                         |

Itchy Eyes

|                           | None | Mild | Moderate | Severe | Extreme | Frequency<br>Times/Week |
|---------------------------|------|------|----------|--------|---------|-------------------------|
| Prior to Onset of Illness | 0 1  | 2 3  | 4 5      | 6 7    | 8 9 10  |                         |
| After Onset of Illness    | 0 1  | 2 3  | 4 5      | 6 7    | 8 9 10  |                         |
| Within the last week      | 0 1  | 2 3  | 4 5      | 6 7    | 8 9 10  |                         |

Watery Eyes

|                           | None | Mild | Moderate | Severe | Extreme | Frequency<br>Times/Week |
|---------------------------|------|------|----------|--------|---------|-------------------------|
| Prior to Onset of Illness | 0 1  | 2 3  | 4 5      | 6 7    | 8 9 10  |                         |
| After Onset of Illness    | 0 1  | 2 3  | 4 5      | 6 7    | 8 9 10  |                         |
| Within the last week      | 0 1  | 2 3  | 4 5      | 6 7    | 8 9 10  |                         |

Headaches

|                           | None | Mild | Moderate | Severe | Extreme | Frequency<br>Times/Week |
|---------------------------|------|------|----------|--------|---------|-------------------------|
| Prior to Onset of Illness | 0 1  | 2 3  | 4 5      | 6 7    | 8 9 10  |                         |
| After Onset of Illness    | 0 1  | 2 3  | 4 5      | 6 7    | 8 9 10  |                         |
| Within the last week      | 0 1  | 2 3  | 4 5      | 6 7    | 8 9 10  |                         |

Short-Term Memory Loss

|                           | None | Mild | Moderate | Severe | Extreme | Frequency<br>Times/Week |
|---------------------------|------|------|----------|--------|---------|-------------------------|
| Prior to Onset of Illness | 0 1  | 2 3  | 4 5      | 6 7    | 8 9 10  |                         |
| After Onset of Illness    | 0 1  | 2 3  | 4 5      | 6 7    | 8 9 10  |                         |
| Within the last week      | 0 1  | 2 3  | 4 5      | 6 7    | 8 9 10  |                         |

Problems Thinking and Concentrating, Focusing

|                           | None | Mild | Moderate | Severe | Extreme | Frequency<br>Times/Week |
|---------------------------|------|------|----------|--------|---------|-------------------------|
| Prior to Onset of Illness | 0 1  | 2 3  | 4 5      | 6 7    | 8 9 10  |                         |
| After Onset of Illness    | 0 1  | 2 3  | 4 5      | 6 7    | 8 9 10  |                         |
| Within the last week      | 0 1  | 2 3  | 4 5      | 6 7    | 8 9 10  |                         |

Deteriorated Penmanship

|                           | None | Mild | Moderate | Severe | Extreme | Frequency<br>Times/Week |   |   |   |   |    |  |
|---------------------------|------|------|----------|--------|---------|-------------------------|---|---|---|---|----|--|
| Prior to Onset of Illness | 0    | 1    | 2        | 3      | 4       | 5                       | 6 | 7 | 8 | 9 | 10 |  |
| After Onset of Illness    | 0    | 1    | 2        | 3      | 4       | 5                       | 6 | 7 | 8 | 9 | 10 |  |
| Within the last week      | 0    | 1    | 2        | 3      | 4       | 5                       | 6 | 7 | 8 | 9 | 10 |  |

Lightheadedness

|                           | None | Mild | Moderate | Severe | Extreme | Frequency<br>Times/Week |   |   |   |   |    |  |
|---------------------------|------|------|----------|--------|---------|-------------------------|---|---|---|---|----|--|
| Prior to Onset of Illness | 0    | 1    | 2        | 3      | 4       | 5                       | 6 | 7 | 8 | 9 | 10 |  |
| After Onset of Illness    | 0    | 1    | 2        | 3      | 4       | 5                       | 6 | 7 | 8 | 9 | 10 |  |
| Within the last week      | 0    | 1    | 2        | 3      | 4       | 5                       | 6 | 7 | 8 | 9 | 10 |  |

Poor Balance or Unsteadiness

|                           | None | Mild | Moderate | Severe | Extreme | Frequency<br>Times/Week |   |   |   |   |    |  |
|---------------------------|------|------|----------|--------|---------|-------------------------|---|---|---|---|----|--|
| Prior to Onset of Illness | 0    | 1    | 2        | 3      | 4       | 5                       | 6 | 7 | 8 | 9 | 10 |  |
| After Onset of Illness    | 0    | 1    | 2        | 3      | 4       | 5                       | 6 | 7 | 8 | 9 | 10 |  |
| Within the last week      | 0    | 1    | 2        | 3      | 4       | 5                       | 6 | 7 | 8 | 9 | 10 |  |

Dizziness/Vertigo

|                           | None | Mild | Moderate | Severe | Extreme | Frequency<br>Times/Week |   |   |   |   |    |  |
|---------------------------|------|------|----------|--------|---------|-------------------------|---|---|---|---|----|--|
| Prior to Onset of Illness | 0    | 1    | 2        | 3      | 4       | 5                       | 6 | 7 | 8 | 9 | 10 |  |
| After Onset of Illness    | 0    | 1    | 2        | 3      | 4       | 5                       | 6 | 7 | 8 | 9 | 10 |  |
| Within the last week      | 0    | 1    | 2        | 3      | 4       | 5                       | 6 | 7 | 8 | 9 | 10 |  |

Ringing in Ears/Tinnitus

|                           | None | Mild | Moderate | Severe | Extreme | Frequency<br>Times/Week |   |   |   |   |    |  |
|---------------------------|------|------|----------|--------|---------|-------------------------|---|---|---|---|----|--|
| Prior to Onset of Illness | 0    | 1    | 2        | 3      | 4       | 5                       | 6 | 7 | 8 | 9 | 10 |  |
| After Onset of Illness    | 0    | 1    | 2        | 3      | 4       | 5                       | 6 | 7 | 8 | 9 | 10 |  |
| Within the last week      | 0    | 1    | 2        | 3      | 4       | 5                       | 6 | 7 | 8 | 9 | 10 |  |

Hearing Loss

|                           | None | Mild | Moderate | Severe | Extreme | Frequency<br>Times/Week |   |   |   |   |    |  |
|---------------------------|------|------|----------|--------|---------|-------------------------|---|---|---|---|----|--|
| Prior to Onset of Illness | 0    | 1    | 2        | 3      | 4       | 5                       | 6 | 7 | 8 | 9 | 10 |  |
| After Onset of Illness    | 0    | 1    | 2        | 3      | 4       | 5                       | 6 | 7 | 8 | 9 | 10 |  |
| Within the last week      | 0    | 1    | 2        | 3      | 4       | 5                       | 6 | 7 | 8 | 9 | 10 |  |

Stuttering or Stammering

|                           | None | Mild | Moderate | Severe | Extreme | Frequency<br>Times/Week |   |   |   |   |    |  |
|---------------------------|------|------|----------|--------|---------|-------------------------|---|---|---|---|----|--|
| Prior to Onset of Illness | 0    | 1    | 2        | 3      | 4       | 5                       | 6 | 7 | 8 | 9 | 10 |  |
| After Onset of Illness    | 0    | 1    | 2        | 3      | 4       | 5                       | 6 | 7 | 8 | 9 | 10 |  |
| Within the last week      | 0    | 1    | 2        | 3      | 4       | 5                       | 6 | 7 | 8 | 9 | 10 |  |

Difficulty Finding Words

|                           | None | Mild | Moderate | Severe | Extreme | Frequency<br>Times/Week |   |   |   |   |    |  |
|---------------------------|------|------|----------|--------|---------|-------------------------|---|---|---|---|----|--|
| Prior to Onset of Illness | 0    | 1    | 2        | 3      | 4       | 5                       | 6 | 7 | 8 | 9 | 10 |  |
| After Onset of Illness    | 0    | 1    | 2        | 3      | 4       | 5                       | 6 | 7 | 8 | 9 | 10 |  |
| Within the last week      | 0    | 1    | 2        | 3      | 4       | 5                       | 6 | 7 | 8 | 9 | 10 |  |

Numbness of Lips

|                           | None | Mild | Moderate | Severe | Extreme | Frequency<br>Times/Week |   |   |   |   |    |  |
|---------------------------|------|------|----------|--------|---------|-------------------------|---|---|---|---|----|--|
| Prior to Onset of Illness | 0    | 1    | 2        | 3      | 4       | 5                       | 6 | 7 | 8 | 9 | 10 |  |
| After Onset of Illness    | 0    | 1    | 2        | 3      | 4       | 5                       | 6 | 7 | 8 | 9 | 10 |  |
| Within the last week      | 0    | 1    | 2        | 3      | 4       | 5                       | 6 | 7 | 8 | 9 | 10 |  |

Drooling

|                           | None | Mild | Moderate | Severe | Extreme | Frequency<br>Times/Week |   |   |   |   |    |  |
|---------------------------|------|------|----------|--------|---------|-------------------------|---|---|---|---|----|--|
| Prior to Onset of Illness | 0    | 1    | 2        | 3      | 4       | 5                       | 6 | 7 | 8 | 9 | 10 |  |
| After Onset of Illness    | 0    | 1    | 2        | 3      | 4       | 5                       | 6 | 7 | 8 | 9 | 10 |  |
| Within the last week      | 0    | 1    | 2        | 3      | 4       | 5                       | 6 | 7 | 8 | 9 | 10 |  |

 Reduced Sense of Smell

|                           | None | Mild | Moderate | Severe | Extreme | Frequency<br>Times/Week |   |   |   |   |    |  |
|---------------------------|------|------|----------|--------|---------|-------------------------|---|---|---|---|----|--|
| Prior to Onset of Illness | 0    | 1    | 2        | 3      | 4       | 5                       | 6 | 7 | 8 | 9 | 10 |  |
| After Onset of Illness    | 0    | 1    | 2        | 3      | 4       | 5                       | 6 | 7 | 8 | 9 | 10 |  |
| Within the last week      | 0    | 1    | 2        | 3      | 4       | 5                       | 6 | 7 | 8 | 9 | 10 |  |

 Dry "Cotton" Mouth

|                           | None | Mild | Moderate | Severe | Extreme | Frequency<br>Times/Week |   |   |   |   |    |  |
|---------------------------|------|------|----------|--------|---------|-------------------------|---|---|---|---|----|--|
| Prior to Onset of Illness | 0    | 1    | 2        | 3      | 4       | 5                       | 6 | 7 | 8 | 9 | 10 |  |
| After Onset of Illness    | 0    | 1    | 2        | 3      | 4       | 5                       | 6 | 7 | 8 | 9 | 10 |  |
| Within the last week      | 0    | 1    | 2        | 3      | 4       | 5                       | 6 | 7 | 8 | 9 | 10 |  |

 Change in, or Lack of Taste

|                           | None | Mild | Moderate | Severe | Extreme | Frequency<br>Times/Week |   |   |   |   |    |  |
|---------------------------|------|------|----------|--------|---------|-------------------------|---|---|---|---|----|--|
| Prior to Onset of Illness | 0    | 1    | 2        | 3      | 4       | 5                       | 6 | 7 | 8 | 9 | 10 |  |
| After Onset of Illness    | 0    | 1    | 2        | 3      | 4       | 5                       | 6 | 7 | 8 | 9 | 10 |  |
| Within the last week      | 0    | 1    | 2        | 3      | 4       | 5                       | 6 | 7 | 8 | 9 | 10 |  |

 Less Capacity for Alcohol

|                           | None | Mild | Moderate | Severe | Extreme | Frequency<br>Times/Week |   |   |   |   |    |  |
|---------------------------|------|------|----------|--------|---------|-------------------------|---|---|---|---|----|--|
| Prior to Onset of Illness | 0    | 1    | 2        | 3      | 4       | 5                       | 6 | 7 | 8 | 9 | 10 |  |
| After Onset of Illness    | 0    | 1    | 2        | 3      | 4       | 5                       | 6 | 7 | 8 | 9 | 10 |  |
| Within the last week      | 0    | 1    | 2        | 3      | 4       | 5                       | 6 | 7 | 8 | 9 | 10 |  |

 Swollen Glands (neck, armpits, groin)

|                           | None | Mild | Moderate | Severe | Extreme | Frequency<br>Times/Week |   |   |   |   |    |  |
|---------------------------|------|------|----------|--------|---------|-------------------------|---|---|---|---|----|--|
| Prior to Onset of Illness | 0    | 1    | 2        | 3      | 4       | 5                       | 6 | 7 | 8 | 9 | 10 |  |
| After Onset of Illness    | 0    | 1    | 2        | 3      | 4       | 5                       | 6 | 7 | 8 | 9 | 10 |  |
| Within the last week      | 0    | 1    | 2        | 3      | 4       | 5                       | 6 | 7 | 8 | 9 | 10 |  |

 Toenail or Foot Fungus

|                           | None | Mild | Moderate | Severe | Extreme | Frequency<br>Times/Week |   |   |   |   |    |  |
|---------------------------|------|------|----------|--------|---------|-------------------------|---|---|---|---|----|--|
| Prior to Onset of Illness | 0    | 1    | 2        | 3      | 4       | 5                       | 6 | 7 | 8 | 9 | 10 |  |
| After Onset of Illness    | 0    | 1    | 2        | 3      | 4       | 5                       | 6 | 7 | 8 | 9 | 10 |  |
| Within the last week      | 0    | 1    | 2        | 3      | 4       | 5                       | 6 | 7 | 8 | 9 | 10 |  |

 Weak Voice or Hoarseness

|                           | None | Mild | Moderate | Severe | Extreme | Frequency<br>Times/Week |   |   |   |   |    |  |
|---------------------------|------|------|----------|--------|---------|-------------------------|---|---|---|---|----|--|
| Prior to Onset of Illness | 0    | 1    | 2        | 3      | 4       | 5                       | 6 | 7 | 8 | 9 | 10 |  |
| After Onset of Illness    | 0    | 1    | 2        | 3      | 4       | 5                       | 6 | 7 | 8 | 9 | 10 |  |
| Within the last week      | 0    | 1    | 2        | 3      | 4       | 5                       | 6 | 7 | 8 | 9 | 10 |  |

 Excessive Thirst

|                           | None | Mild | Moderate | Severe | Extreme | Frequency<br>Times/Week |   |   |   |   |    |  |
|---------------------------|------|------|----------|--------|---------|-------------------------|---|---|---|---|----|--|
| Prior to Onset of Illness | 0    | 1    | 2        | 3      | 4       | 5                       | 6 | 7 | 8 | 9 | 10 |  |
| After Onset of Illness    | 0    | 1    | 2        | 3      | 4       | 5                       | 6 | 7 | 8 | 9 | 10 |  |
| Within the last week      | 0    | 1    | 2        | 3      | 4       | 5                       | 6 | 7 | 8 | 9 | 10 |  |

Loss of Sexual Libido (sex drive)

|                           | None | Mild | Moderate | Severe | Extreme | Frequency<br>Times/Week |   |   |   |   |    |  |
|---------------------------|------|------|----------|--------|---------|-------------------------|---|---|---|---|----|--|
| Prior to Onset of Illness | 0    | 1    | 2        | 3      | 4       | 5                       | 6 | 7 | 8 | 9 | 10 |  |
| After Onset of Illness    | 0    | 1    | 2        | 3      | 4       | 5                       | 6 | 7 | 8 | 9 | 10 |  |
| Within the last week      | 0    | 1    | 2        | 3      | 4       | 5                       | 6 | 7 | 8 | 9 | 10 |  |

Swollen Abdomen

|                           | None | Mild | Moderate | Severe | Extreme | Frequency<br>Times/Week |   |   |   |   |    |  |
|---------------------------|------|------|----------|--------|---------|-------------------------|---|---|---|---|----|--|
| Prior to Onset of Illness | 0    | 1    | 2        | 3      | 4       | 5                       | 6 | 7 | 8 | 9 | 10 |  |
| After Onset of Illness    | 0    | 1    | 2        | 3      | 4       | 5                       | 6 | 7 | 8 | 9 | 10 |  |
| Within the last week      | 0    | 1    | 2        | 3      | 4       | 5                       | 6 | 7 | 8 | 9 | 10 |  |

Reduced Joint Mobility

|                           | None | Mild | Moderate | Severe | Extreme | Frequency<br>Times/Week |   |   |   |   |    |  |
|---------------------------|------|------|----------|--------|---------|-------------------------|---|---|---|---|----|--|
| Prior to Onset of Illness | 0    | 1    | 2        | 3      | 4       | 5                       | 6 | 7 | 8 | 9 | 10 |  |
| After Onset of Illness    | 0    | 1    | 2        | 3      | 4       | 5                       | 6 | 7 | 8 | 9 | 10 |  |
| Within the last week      | 0    | 1    | 2        | 3      | 4       | 5                       | 6 | 7 | 8 | 9 | 10 |  |

Joint Pain or Discomfort

|                           | None | Mild | Moderate | Severe | Extreme | Frequency<br>Times/Week |   |   |   |   |    |  |
|---------------------------|------|------|----------|--------|---------|-------------------------|---|---|---|---|----|--|
| Prior to Onset of Illness | 0    | 1    | 2        | 3      | 4       | 5                       | 6 | 7 | 8 | 9 | 10 |  |
| After Onset of Illness    | 0    | 1    | 2        | 3      | 4       | 5                       | 6 | 7 | 8 | 9 | 10 |  |
| Within the last week      | 0    | 1    | 2        | 3      | 4       | 5                       | 6 | 7 | 8 | 9 | 10 |  |

Muscle Spasms or Cramps

|                           | None | Mild | Moderate | Severe | Extreme | Frequency<br>Times/Week |   |   |   |   |    |  |
|---------------------------|------|------|----------|--------|---------|-------------------------|---|---|---|---|----|--|
| Prior to Onset of Illness | 0    | 1    | 2        | 3      | 4       | 5                       | 6 | 7 | 8 | 9 | 10 |  |
| After Onset of Illness    | 0    | 1    | 2        | 3      | 4       | 5                       | 6 | 7 | 8 | 9 | 10 |  |
| Within the last week      | 0    | 1    | 2        | 3      | 4       | 5                       | 6 | 7 | 8 | 9 | 10 |  |

Aching or Burning Muscles

|                           | None | Mild | Moderate | Severe | Extreme | Frequency<br>Times/Week |   |   |   |   |    |  |
|---------------------------|------|------|----------|--------|---------|-------------------------|---|---|---|---|----|--|
| Prior to Onset of Illness | 0    | 1    | 2        | 3      | 4       | 5                       | 6 | 7 | 8 | 9 | 10 |  |
| After Onset of Illness    | 0    | 1    | 2        | 3      | 4       | 5                       | 6 | 7 | 8 | 9 | 10 |  |
| Within the last week      | 0    | 1    | 2        | 3      | 4       | 5                       | 6 | 7 | 8 | 9 | 10 |  |

Numb Hands

|                           | None | Mild | Moderate | Severe | Extreme | Frequency<br>Times/Week |   |   |   |   |    |  |
|---------------------------|------|------|----------|--------|---------|-------------------------|---|---|---|---|----|--|
| Prior to Onset of Illness | 0    | 1    | 2        | 3      | 4       | 5                       | 6 | 7 | 8 | 9 | 10 |  |
| After Onset of Illness    | 0    | 1    | 2        | 3      | 4       | 5                       | 6 | 7 | 8 | 9 | 10 |  |
| Within the last week      | 0    | 1    | 2        | 3      | 4       | 5                       | 6 | 7 | 8 | 9 | 10 |  |

Tingling Hands

|                           | None | Mild | Moderate | Severe | Extreme | Frequency<br>Times/Week |   |   |   |   |    |  |
|---------------------------|------|------|----------|--------|---------|-------------------------|---|---|---|---|----|--|
| Prior to Onset of Illness | 0    | 1    | 2        | 3      | 4       | 5                       | 6 | 7 | 8 | 9 | 10 |  |
| After Onset of Illness    | 0    | 1    | 2        | 3      | 4       | 5                       | 6 | 7 | 8 | 9 | 10 |  |
| Within the last week      | 0    | 1    | 2        | 3      | 4       | 5                       | 6 | 7 | 8 | 9 | 10 |  |

Other Loss of Strength/Endurance

|                           | None | Mild | Moderate | Severe | Extreme | Frequency<br>Times/Week |   |   |   |   |    |  |
|---------------------------|------|------|----------|--------|---------|-------------------------|---|---|---|---|----|--|
| Prior to Onset of Illness | 0    | 1    | 2        | 3      | 4       | 5                       | 6 | 7 | 8 | 9 | 10 |  |
| After Onset of Illness    | 0    | 1    | 2        | 3      | 4       | 5                       | 6 | 7 | 8 | 9 | 10 |  |
| Within the last week      | 0    | 1    | 2        | 3      | 4       | 5                       | 6 | 7 | 8 | 9 | 10 |  |

Other Numbness or Tingling (Paresthesia)

|                           | None | Mild | Moderate | Severe | Extreme | Frequency<br>Times/Week |   |   |   |   |    |  |
|---------------------------|------|------|----------|--------|---------|-------------------------|---|---|---|---|----|--|
| Prior to Onset of Illness | 0    | 1    | 2        | 3      | 4       | 5                       | 6 | 7 | 8 | 9 | 10 |  |
| After Onset of Illness    | 0    | 1    | 2        | 3      | 4       | 5                       | 6 | 7 | 8 | 9 | 10 |  |
| Within the last week      | 0    | 1    | 2        | 3      | 4       | 5                       | 6 | 7 | 8 | 9 | 10 |  |

Trembling, Shaking, or Twitching

|                           | None | Mild | Moderate | Severe | Extreme | Frequency<br>Times/Week |   |   |   |   |    |  |
|---------------------------|------|------|----------|--------|---------|-------------------------|---|---|---|---|----|--|
| Prior to Onset of Illness | 0    | 1    | 2        | 3      | 4       | 5                       | 6 | 7 | 8 | 9 | 10 |  |
| After Onset of Illness    | 0    | 1    | 2        | 3      | 4       | 5                       | 6 | 7 | 8 | 9 | 10 |  |
| Within the last week      | 0    | 1    | 2        | 3      | 4       | 5                       | 6 | 7 | 8 | 9 | 10 |  |

Swelling of Ankles

|                           | None | Mild | Moderate | Severe | Extreme | Frequency<br>Times/Week |   |   |   |   |    |  |
|---------------------------|------|------|----------|--------|---------|-------------------------|---|---|---|---|----|--|
| Prior to Onset of Illness | 0    | 1    | 2        | 3      | 4       | 5                       | 6 | 7 | 8 | 9 | 10 |  |
| After Onset of Illness    | 0    | 1    | 2        | 3      | 4       | 5                       | 6 | 7 | 8 | 9 | 10 |  |
| Within the last week      | 0    | 1    | 2        | 3      | 4       | 5                       | 6 | 7 | 8 | 9 | 10 |  |

Swelling of Body

|                           | None | Mild | Moderate | Severe | Extreme | Frequency<br>Times/Week |   |   |   |   |    |  |
|---------------------------|------|------|----------|--------|---------|-------------------------|---|---|---|---|----|--|
| Prior to Onset of Illness | 0    | 1    | 2        | 3      | 4       | 5                       | 6 | 7 | 8 | 9 | 10 |  |
| After Onset of Illness    | 0    | 1    | 2        | 3      | 4       | 5                       | 6 | 7 | 8 | 9 | 10 |  |
| Within the last week      | 0    | 1    | 2        | 3      | 4       | 5                       | 6 | 7 | 8 | 9 | 10 |  |

Black & Blue Bruising More Easily

|                           | None | Mild | Moderate | Severe | Extreme | Frequency<br>Times/Week |   |   |   |   |    |  |
|---------------------------|------|------|----------|--------|---------|-------------------------|---|---|---|---|----|--|
| Prior to Onset of Illness | 0    | 1    | 2        | 3      | 4       | 5                       | 6 | 7 | 8 | 9 | 10 |  |
| After Onset of Illness    | 0    | 1    | 2        | 3      | 4       | 5                       | 6 | 7 | 8 | 9 | 10 |  |
| Within the last week      | 0    | 1    | 2        | 3      | 4       | 5                       | 6 | 7 | 8 | 9 | 10 |  |

Aching Joints

|                           | None | Mild | Moderate | Severe | Extreme | Frequency<br>Times/Week |   |   |   |   |    |  |
|---------------------------|------|------|----------|--------|---------|-------------------------|---|---|---|---|----|--|
| Prior to Onset of Illness | 0    | 1    | 2        | 3      | 4       | 5                       | 6 | 7 | 8 | 9 | 10 |  |
| After Onset of Illness    | 0    | 1    | 2        | 3      | 4       | 5                       | 6 | 7 | 8 | 9 | 10 |  |
| Within the last week      | 0    | 1    | 2        | 3      | 4       | 5                       | 6 | 7 | 8 | 9 | 10 |  |

Pain in Lower Back

|                           | None | Mild | Moderate | Severe | Extreme | Frequency<br>Times/Week |   |   |   |   |    |  |
|---------------------------|------|------|----------|--------|---------|-------------------------|---|---|---|---|----|--|
| Prior to Onset of Illness | 0    | 1    | 2        | 3      | 4       | 5                       | 6 | 7 | 8 | 9 | 10 |  |
| After Onset of Illness    | 0    | 1    | 2        | 3      | 4       | 5                       | 6 | 7 | 8 | 9 | 10 |  |
| Within the last week      | 0    | 1    | 2        | 3      | 4       | 5                       | 6 | 7 | 8 | 9 | 10 |  |

Pain in Neck

|                           | None | Mild | Moderate | Severe | Extreme | Frequency<br>Times/Week |   |   |   |   |    |  |
|---------------------------|------|------|----------|--------|---------|-------------------------|---|---|---|---|----|--|
| Prior to Onset of Illness | 0    | 1    | 2        | 3      | 4       | 5                       | 6 | 7 | 8 | 9 | 10 |  |
| After Onset of Illness    | 0    | 1    | 2        | 3      | 4       | 5                       | 6 | 7 | 8 | 9 | 10 |  |
| Within the last week      | 0    | 1    | 2        | 3      | 4       | 5                       | 6 | 7 | 8 | 9 | 10 |  |

Excessive Hunger

|                           | None | Mild | Moderate | Severe | Extreme | Frequency<br>Times/Week |   |   |   |   |    |  |
|---------------------------|------|------|----------|--------|---------|-------------------------|---|---|---|---|----|--|
| Prior to Onset of Illness | 0    | 1    | 2        | 3      | 4       | 5                       | 6 | 7 | 8 | 9 | 10 |  |
| After Onset of Illness    | 0    | 1    | 2        | 3      | 4       | 5                       | 6 | 7 | 8 | 9 | 10 |  |
| Within the last week      | 0    | 1    | 2        | 3      | 4       | 5                       | 6 | 7 | 8 | 9 | 10 |  |

Loss of Interest in Food

|                           | None<br>0 | 1 | Mild<br>2 | 3 | Moderate<br>4 | 5 | 6 | Severe<br>7 | 8 | Extreme<br>9 | 10 | Frequency<br>Times/Week |
|---------------------------|-----------|---|-----------|---|---------------|---|---|-------------|---|--------------|----|-------------------------|
| Prior to Onset of Illness | 0         | 1 | 2         | 3 | 4             | 5 | 6 | 7           | 8 | 9            | 10 |                         |
| After Onset of Illness    | 0         | 1 | 2         | 3 | 4             | 5 | 6 | 7           | 8 | 9            | 10 |                         |
| Within the last week      | 0         | 1 | 2         | 3 | 4             | 5 | 6 | 7           | 8 | 9            | 10 |                         |

Difficulty Sleeping (insomnia)

|                           | None<br>0 | 1 | Mild<br>2 | 3 | Moderate<br>4 | 5 | 6 | Severe<br>7 | 8 | Extreme<br>9 | 10 | Frequency<br>Times/Week |
|---------------------------|-----------|---|-----------|---|---------------|---|---|-------------|---|--------------|----|-------------------------|
| Prior to Onset of Illness | 0         | 1 | 2         | 3 | 4             | 5 | 6 | 7           | 8 | 9            | 10 |                         |
| After Onset of Illness    | 0         | 1 | 2         | 3 | 4             | 5 | 6 | 7           | 8 | 9            | 10 |                         |
| Within the last week      | 0         | 1 | 2         | 3 | 4             | 5 | 6 | 7           | 8 | 9            | 10 |                         |

Difficulty Waking Up

|                           | None<br>0 | 1 | Mild<br>2 | 3 | Moderate<br>4 | 5 | 6 | Severe<br>7 | 8 | Extreme<br>9 | 10 | Frequency<br>Times/Week |
|---------------------------|-----------|---|-----------|---|---------------|---|---|-------------|---|--------------|----|-------------------------|
| Prior to Onset of Illness | 0         | 1 | 2         | 3 | 4             | 5 | 6 | 7           | 8 | 9            | 10 |                         |
| After Onset of Illness    | 0         | 1 | 2         | 3 | 4             | 5 | 6 | 7           | 8 | 9            | 10 |                         |
| Within the last week      | 0         | 1 | 2         | 3 | 4             | 5 | 6 | 7           | 8 | 9            | 10 |                         |

Sensitivity to Cold (easily chilled)

|                           | None<br>0 | 1 | Mild<br>2 | 3 | Moderate<br>4 | 5 | 6 | Severe<br>7 | 8 | Extreme<br>9 | 10 | Frequency<br>Times/Week |
|---------------------------|-----------|---|-----------|---|---------------|---|---|-------------|---|--------------|----|-------------------------|
| Prior to Onset of Illness | 0         | 1 | 2         | 3 | 4             | 5 | 6 | 7           | 8 | 9            | 10 |                         |
| After Onset of Illness    | 0         | 1 | 2         | 3 | 4             | 5 | 6 | 7           | 8 | 9            | 10 |                         |
| Within the last week      | 0         | 1 | 2         | 3 | 4             | 5 | 6 | 7           | 8 | 9            | 10 |                         |

Teeth Easily Chilled by Cold Foods

|                           | None<br>0 | 1 | Mild<br>2 | 3 | Moderate<br>4 | 5 | 6 | Severe<br>7 | 8 | Extreme<br>9 | 10 | Frequency<br>Times/Week |
|---------------------------|-----------|---|-----------|---|---------------|---|---|-------------|---|--------------|----|-------------------------|
| Prior to Onset of Illness | 0         | 1 | 2         | 3 | 4             | 5 | 6 | 7           | 8 | 9            | 10 |                         |
| After Onset of Illness    | 0         | 1 | 2         | 3 | 4             | 5 | 6 | 7           | 8 | 9            | 10 |                         |
| Within the last week      | 0         | 1 | 2         | 3 | 4             | 5 | 6 | 7           | 8 | 9            | 10 |                         |

Teeth Loose

|                           | None<br>0 | 1 | Mild<br>2 | 3 | Moderate<br>4 | 5 | 6 | Severe<br>7 | 8 | Extreme<br>9 | 10 | Frequency<br>Times/Week |
|---------------------------|-----------|---|-----------|---|---------------|---|---|-------------|---|--------------|----|-------------------------|
| Prior to Onset of Illness | 0         | 1 | 2         | 3 | 4             | 5 | 6 | 7           | 8 | 9            | 10 |                         |
| After Onset of Illness    | 0         | 1 | 2         | 3 | 4             | 5 | 6 | 7           | 8 | 9            | 10 |                         |
| Within the last week      | 0         | 1 | 2         | 3 | 4             | 5 | 6 | 7           | 8 | 9            | 10 |                         |

Frequent infections (specify) \_\_\_\_\_

|                           | None<br>0 | 1 | Mild<br>2 | 3 | Moderate<br>4 | 5 | 6 | Severe<br>7 | 8 | Extreme<br>9 | 10 | Frequency<br>Times/Week |
|---------------------------|-----------|---|-----------|---|---------------|---|---|-------------|---|--------------|----|-------------------------|
| Prior to Onset of Illness | 0         | 1 | 2         | 3 | 4             | 5 | 6 | 7           | 8 | 9            | 10 |                         |
| After Onset of Illness    | 0         | 1 | 2         | 3 | 4             | 5 | 6 | 7           | 8 | 9            | 10 |                         |
| Within the last week      | 0         | 1 | 2         | 3 | 4             | 5 | 6 | 7           | 8 | 9            | 10 |                         |

Frequent Colds or Flu

|                           | None<br>0 | 1 | Mild<br>2 | 3 | Moderate<br>4 | 5 | 6 | Severe<br>7 | 8 | Extreme<br>9 | 10 | Frequency<br>Times/Week |
|---------------------------|-----------|---|-----------|---|---------------|---|---|-------------|---|--------------|----|-------------------------|
| Prior to Onset of Illness | 0         | 1 | 2         | 3 | 4             | 5 | 6 | 7           | 8 | 9            | 10 |                         |
| After Onset of Illness    | 0         | 1 | 2         | 3 | 4             | 5 | 6 | 7           | 8 | 9            | 10 |                         |
| Within the last week      | 0         | 1 | 2         | 3 | 4             | 5 | 6 | 7           | 8 | 9            | 10 |                         |

White Coated Tongue

|                           | None                   | Mild | Moderate | Severe | Extreme | Frequency<br>Times/Week |
|---------------------------|------------------------|------|----------|--------|---------|-------------------------|
| Prior to Onset of Illness | 0 1 2 3 4 5 6 7 8 9 10 |      |          |        |         |                         |
| After Onset of Illness    | 0 1 2 3 4 5 6 7 8 9 10 |      |          |        |         |                         |
| Within the last week      | 0 1 2 3 4 5 6 7 8 9 10 |      |          |        |         |                         |

Mouth Sores

|                           | None                   | Mild | Moderate | Severe | Extreme | Frequency<br>Times/Week |
|---------------------------|------------------------|------|----------|--------|---------|-------------------------|
| Prior to Onset of Illness | 0 1 2 3 4 5 6 7 8 9 10 |      |          |        |         |                         |
| After Onset of Illness    | 0 1 2 3 4 5 6 7 8 9 10 |      |          |        |         |                         |
| Within the last week      | 0 1 2 3 4 5 6 7 8 9 10 |      |          |        |         |                         |

Lip Sores

|                           | None                   | Mild | Moderate | Severe | Extreme | Frequency<br>Times/Week |
|---------------------------|------------------------|------|----------|--------|---------|-------------------------|
| Prior to Onset of Illness | 0 1 2 3 4 5 6 7 8 9 10 |      |          |        |         |                         |
| After Onset of Illness    | 0 1 2 3 4 5 6 7 8 9 10 |      |          |        |         |                         |
| Within the last week      | 0 1 2 3 4 5 6 7 8 9 10 |      |          |        |         |                         |

Increase in Allergic Sensitivities

|                           | None                   | Mild | Moderate | Severe | Extreme | Frequency<br>Times/Week |
|---------------------------|------------------------|------|----------|--------|---------|-------------------------|
| Prior to Onset of Illness | 0 1 2 3 4 5 6 7 8 9 10 |      |          |        |         |                         |
| After Onset of Illness    | 0 1 2 3 4 5 6 7 8 9 10 |      |          |        |         |                         |
| Within the last week      | 0 1 2 3 4 5 6 7 8 9 10 |      |          |        |         |                         |

Bothered by Diesel or Gasoline Exhaust or Fumes

|                           | None                   | Mild | Moderate | Severe | Extreme | Frequency<br>Times/Week |
|---------------------------|------------------------|------|----------|--------|---------|-------------------------|
| Prior to Onset of Illness | 0 1 2 3 4 5 6 7 8 9 10 |      |          |        |         |                         |
| After Onset of Illness    | 0 1 2 3 4 5 6 7 8 9 10 |      |          |        |         |                         |
| Within the last week      | 0 1 2 3 4 5 6 7 8 9 10 |      |          |        |         |                         |

Bothered by Cigarettes, Smoke

|                           | None                   | Mild | Moderate | Severe | Extreme | Frequency<br>Times/Week |
|---------------------------|------------------------|------|----------|--------|---------|-------------------------|
| Prior to Onset of Illness | 0 1 2 3 4 5 6 7 8 9 10 |      |          |        |         |                         |
| After Onset of Illness    | 0 1 2 3 4 5 6 7 8 9 10 |      |          |        |         |                         |
| Within the last week      | 0 1 2 3 4 5 6 7 8 9 10 |      |          |        |         |                         |

**(WOMEN)** Frequent Yeast Infections

|                           | None                   | Mild | Moderate | Severe | Extreme | Frequency<br>Times/Week |
|---------------------------|------------------------|------|----------|--------|---------|-------------------------|
| Prior to Onset of Illness | 0 1 2 3 4 5 6 7 8 9 10 |      |          |        |         |                         |
| After Onset of Illness    | 0 1 2 3 4 5 6 7 8 9 10 |      |          |        |         |                         |
| Within the last week      | 0 1 2 3 4 5 6 7 8 9 10 |      |          |        |         |                         |

**(WOMEN)** Irregular Menstrual Periods

|                           | None                   | Mild | Moderate | Severe | Extreme | Frequency<br>Times/Week |
|---------------------------|------------------------|------|----------|--------|---------|-------------------------|
| Prior to Onset of Illness | 0 1 2 3 4 5 6 7 8 9 10 |      |          |        |         |                         |
| After Onset of Illness    | 0 1 2 3 4 5 6 7 8 9 10 |      |          |        |         |                         |
| Within the last week      | 0 1 2 3 4 5 6 7 8 9 10 |      |          |        |         |                         |

**(WOMEN)** Worse PMS

|                           |      |      |          |        |         |                         |   |   |   |   |    |  |
|---------------------------|------|------|----------|--------|---------|-------------------------|---|---|---|---|----|--|
|                           | None | Mild | Moderate | Severe | Extreme | Frequency<br>Times/Week |   |   |   |   |    |  |
| Prior to Onset of Illness | 0    | 1    | 2        | 3      | 4       | 5                       | 6 | 7 | 8 | 9 | 10 |  |
| After Onset of Illness    | 0    | 1    | 2        | 3      | 4       | 5                       | 6 | 7 | 8 | 9 | 10 |  |
| Within the last week      | 0    | 1    | 2        | 3      | 4       | 5                       | 6 | 7 | 8 | 9 | 10 |  |

**(WOMEN)** Worse Menstrual Cramps

|                           |      |      |          |        |         |                         |   |   |   |   |    |  |
|---------------------------|------|------|----------|--------|---------|-------------------------|---|---|---|---|----|--|
|                           | None | Mild | Moderate | Severe | Extreme | Frequency<br>Times/Week |   |   |   |   |    |  |
| Prior to Onset of Illness | 0    | 1    | 2        | 3      | 4       | 5                       | 6 | 7 | 8 | 9 | 10 |  |
| After Onset of Illness    | 0    | 1    | 2        | 3      | 4       | 5                       | 6 | 7 | 8 | 9 | 10 |  |
| Within the last week      | 0    | 1    | 2        | 3      | 4       | 5                       | 6 | 7 | 8 | 9 | 10 |  |

**(WOMEN)** Cervical Pain

|                           |      |      |          |        |         |                         |   |   |   |   |    |  |
|---------------------------|------|------|----------|--------|---------|-------------------------|---|---|---|---|----|--|
|                           | None | Mild | Moderate | Severe | Extreme | Frequency<br>Times/Week |   |   |   |   |    |  |
| Prior to Onset of Illness | 0    | 1    | 2        | 3      | 4       | 5                       | 6 | 7 | 8 | 9 | 10 |  |
| After Onset of Illness    | 0    | 1    | 2        | 3      | 4       | 5                       | 6 | 7 | 8 | 9 | 10 |  |
| Within the last week      | 0    | 1    | 2        | 3      | 4       | 5                       | 6 | 7 | 8 | 9 | 10 |  |

**(WOMEN)** Endometriosis

|                           |      |      |          |        |         |                         |   |   |   |   |    |  |
|---------------------------|------|------|----------|--------|---------|-------------------------|---|---|---|---|----|--|
|                           | None | Mild | Moderate | Severe | Extreme | Frequency<br>Times/Week |   |   |   |   |    |  |
| Prior to Onset of Illness | 0    | 1    | 2        | 3      | 4       | 5                       | 6 | 7 | 8 | 9 | 10 |  |
| After Onset of Illness    | 0    | 1    | 2        | 3      | 4       | 5                       | 6 | 7 | 8 | 9 | 10 |  |
| Within the last week      | 0    | 1    | 2        | 3      | 4       | 5                       | 6 | 7 | 8 | 9 | 10 |  |

**(MEN)** Sexual Impotence

|                           |      |      |          |        |         |                         |   |   |   |   |    |  |
|---------------------------|------|------|----------|--------|---------|-------------------------|---|---|---|---|----|--|
|                           | None | Mild | Moderate | Severe | Extreme | Frequency<br>Times/Week |   |   |   |   |    |  |
| Prior to Onset of Illness | 0    | 1    | 2        | 3      | 4       | 5                       | 6 | 7 | 8 | 9 | 10 |  |
| After Onset of Illness    | 0    | 1    | 2        | 3      | 4       | 5                       | 6 | 7 | 8 | 9 | 10 |  |
| Within the last week      | 0    | 1    | 2        | 3      | 4       | 5                       | 6 | 7 | 8 | 9 | 10 |  |

**(MEN)** Aching or Swollen Testicles

|                           |      |      |          |        |         |                         |   |   |   |   |    |  |
|---------------------------|------|------|----------|--------|---------|-------------------------|---|---|---|---|----|--|
|                           | None | Mild | Moderate | Severe | Extreme | Frequency<br>Times/Week |   |   |   |   |    |  |
| Prior to Onset of Illness | 0    | 1    | 2        | 3      | 4       | 5                       | 6 | 7 | 8 | 9 | 10 |  |
| After Onset of Illness    | 0    | 1    | 2        | 3      | 4       | 5                       | 6 | 7 | 8 | 9 | 10 |  |
| Within the last week      | 0    | 1    | 2        | 3      | 4       | 5                       | 6 | 7 | 8 | 9 | 10 |  |

**OTHER SIGNS/SYMPTOMS:** \_\_\_\_\_

---



---



---



---



---



**WHAT DO YOU THINK IS THE CAUSE OF YOUR CONDITION?** \_\_\_\_\_

\_\_\_\_\_

\_\_\_\_\_

\_\_\_\_\_

\_\_\_\_\_

**RANK ORDER OF MOST IMPORTANT SYMPTOMS:**

**LABORATORY TESTS:**

**Prior to Onset of Illness**

↓ **At any time After Onset of Illness**

↓ ↓ **Not Applicable**

↓ ↓ ↓

☐ ☐ ☐ Elevated cholesterol

☐ ☐ ☐ High blood pressure

☐ ☐ ☐ Low blood pressure

☐ ☐ ☐ Large weight loss (\_\_\_\_\_ lbs.)

☐ ☐ ☐ Large weight gain (\_\_\_\_\_ lbs.)

☐ ☐ ☐ \_\_\_\_\_

☐ ☐ ☐ \_\_\_\_\_

☐ ☐ ☐ \_\_\_\_\_

☐ ☐ ☐ \_\_\_\_\_

1. \_\_\_\_\_

2. \_\_\_\_\_

3. \_\_\_\_\_

4. \_\_\_\_\_

5. \_\_\_\_\_

6. \_\_\_\_\_

7. \_\_\_\_\_

8. \_\_\_\_\_

9. \_\_\_\_\_

10. \_\_\_\_\_

**VACCINATIONS / OTHER EXPOSURES:**

**Prior to Onset of Illness**

↓ **At any time After Onset of Illness**

↓ ↓ **Not Applicable**

↓ ↓ ↓

☐ ☐ ☐ Polio Vaccination (Date \_\_\_\_\_)

☐ ☐ ☐ DPT Vaccination (Date \_\_\_\_\_)

☐ ☐ ☐ Other Vaccination (Date \_\_\_\_\_)

☐ ☐ ☐ Other Vaccination (type \_\_\_\_\_ Date \_\_\_\_\_)

☐ ☐ ☐ Other Vaccination (type \_\_\_\_\_ Date \_\_\_\_\_)

☐ ☐ ☐ SMOG or air pollution

☐ ☐ ☐ Gasoline or Diesel fuel/fumes ( within 100 meters/yards ☐ ; within 1 meter/yard ☐ ; direct contact ☐ )

☐ ☐ ☐ Oil fire or smoke ( within 100 meters/yards ☐ ; within 1 meter/yard ☐ ; direct contact ☐ )

- ☐ ☐ ☐ Pesticide exposure ( within 100 meters/yards ☐ ; within 1 meter/yard ☐ ; direct contact ☐ )
- ☐ ☐ ☐ Herbicide exposure ( within 100 meters/yards ☐ ; within 1 meter/yard ☐ ; direct contact ☐ )
- ☐ ☐ ☐ Hair Salon exposure ( within 100 meters/yards ☐ ; within 1 meter/yard ☐ ; direct contact ☐ )
- ☐ ☐ ☐ New Office Buildings ( within 100 meters/yards ☐ ; within 1 meter/yard ☐ ; direct contact ☐ )
- ☐ ☐ ☐ Carpeting or curtains ( within 1 meter/yard ☐ ; direct contact ☐ )
- ☐ ☐ ☐ Organic Chemicals, Glues, Paints ( within 100 meters/yards ☐ ; within 1 meter/yard ☐ ; direct contact ☐ )
- ☐ ☐ ☐ Cosmetics, Perfumes, Hair Sprays, Nail Polish ( within 1 meter/yard ☐ ; direct contact ☐ )
- ☐ ☐ ☐ Sewage pools ( within 100 meters ☐ ; within 1 meter ☐ ; direct contact ☐ )
- ☐ ☐ ☐ Insects ( within 100 meters ☐ ; within 1 meter ☐ ; direct contact ☐ )

**PREVIOUS DIAGNOSES FOR SIGNS AND SYMPTOMS OF PRESENT ILLNESS:**

---

---

---

---

---

---

---

**TREATMENTS FOR ANY SYMPTOMS OR ILLNESS BEFORE ONSET OF PRESENT ILLNESS:**

---

---

---

---

---

---

---

**TREATMENTS FOR SYMPTOMS OF ILLNESS AFTER ONSET OF PRESENT ILLNESS:**

---

---

---

---

---

---

---

THE ABOVE INFORMATION WILL ONLY BE USED TO COMPARE SIGNS AND SYMPTOMS WITH INFECTIOUS AGENTS FOUND IN BLOOD TESTS. YOUR IDENTITY AND YOUR TEST RESULTS WILL BE KEPT CONFIDENTIAL AND WILL NOT BE RELEASED TO ANY INSURANCE COMPANY, EMPLOYER, LOCAL, STATE OR FEDERAL GOVERNMENT AGENCY IN ANY FORM THAT COULD COMPROMISE PATIENT CONFIDENTIALITY WITHOUT YOUR WRITTEN APPROVAL.

**PLEASE DIRECT ANY QUESTIONS TO AND SEND YOUR SURVEY FORM TO THE ADDRESS BELOW:**

Garth L. Nicolson, Ph.D., M.D. (H)  
 President, Chief Scientific Officer and Research Professor of Molecular Pathology  
 The Institute for Molecular Medicine (a nonprofit research institute) T: 949-715-5972  
 P.O. Box 9355, S. Laguna Beach, CA 92652, Email:gnicolson@immed.org
